# Supplementary material
Source: publisher figshare collection journal article supplement (https://frontiersin.figshare.com/ndownloader/files/31290280)
Supplement: Supplementary file [file 31290280]

## *Supplementary Material*

### Supplementary Tables

**Table S1. The primers for real-time polymerase chain reaction**

| Gene  | Purpose | Sequence (5'-3')       | T <sub>m</sub> (°C) |
|-------|---------|------------------------|---------------------|
| Glo-1 | Forward | CCGCCATGATTACATTTGA    | 55.75               |
|       | Revered | GTTGGCATGGCCTTTCCA     | 57.30               |
| GADPH | Forward | ACCCACTCCTCCACCTTTGA   | 59.85               |
|       | Revered | CTGTTGCTGTAGCCAAATTCGT | 58.21               |

**Table S2. SNP information and oligonucleotide sequences used for Glo- 1 genotyping**

| SNP       | Purpose          |         | Sequence (5'→3')                                                               |
|-----------|------------------|---------|--------------------------------------------------------------------------------|
| rs4746    | PCR              | Forward | AGGGTCTGAATTGCCATTGTGGT                                                        |
|           | primers          | Revered | TTTGTAGCAGGGGTTAGGCCAAT                                                        |
|           | Primer extension |         | TTTTTTTTTTTTTTTTTTTTTTTTTTTGGGGCACTGAAGAT<br>GATG                              |
| rs1781735 | PCR              | Forward | CACCAAGATGTCCCCGTCTCTC                                                         |
|           | primers          | Revered | AATTTCTAGTCTTATGGAGCTGGTGTCTG                                                  |
|           | Primer extension |         | TTTTTTTTTTTTTTTTTTTTTTTTTTTTTTTTTTTTTTTTTT<br>GGTGTCTGACAAACTGAAGCTG           |
| rs1130534 | PCR              | Forward | GAGACTTAAAAGTAAATCATGGTGAGATGG                                                 |
|           | primers          | Revered | GGACATTGTAGCTATGTTTTCCCTTCC                                                    |
|           | Primer extension |         | TTTTTTTTTTTTTTTTTTTTTTTTTTTTTTTTTTTTTTTTTT<br>TTTTGGCAATTCAGACCCTCGAGG         |
| rs9470916 | PCR              | Forward | ACTCCAGCCCAAGAGCCAAGAG                                                         |
|           | primers          | Revered | AAGGGGAGGAGGAAGGAAATGA                                                         |
|           | Primer extension |         | TTTTTTTTTTTTTTTTTTTTTTTTTTTTTTTTTTTTTTTTTT<br>TTTTTTTTTTTCCTAGCCCAGTGTCTGGGTAC |

**Table S3. The primers for promoter luciferase activity assay**

| Gene  | Purpose | Sequence (5'-3')                       | Enzyme         |
|-------|---------|----------------------------------------|----------------|
| Glo-1 | 3'UTR-F | cacaactcgagTGCTGTGAGAATTCTCCTTT<br>GAG | <i>Xho</i> I   |
|       | 3'UTR-R | tgaggatccCGGAGGAGTCACCCACACTAC         | <i>Bam</i> H I |

**Table S4. Analysis of associations of mRNA expression and enzymatic activity of Glo-1**

|                                 |                                    | No. | Age (year)                        | RNA expression/Enzyme activity                    |
|---------------------------------|------------------------------------|-----|-----------------------------------|---------------------------------------------------|
| <b>RNA expression analysis</b>  |                                    |     |                                   |                                                   |
| <b>Total</b>                    |                                    |     |                                   |                                                   |
|                                 | Schizophrenia                      | 63  | 31.25 ± 10.08                     | 2.87 ± 1.58                                       |
|                                 | Control                            | 53  | 32.94 ± 9.04                      | 5.68 ± 4.40                                       |
|                                 | <i>P</i>                           |     | <i>t</i> = 0.94, <i>P</i> = 0.34  | <i>t</i> = 4.42, <i>P</i> = 3.98×10 <sup>-5</sup> |
| <b>Schizophrenia</b>            |                                    |     |                                   |                                                   |
|                                 | GG                                 | 12  | 27.17 ± 5.20                      | 3.73 ± 0.23                                       |
|                                 | GT                                 | 24  | 32.91 ± 10.78                     | 2.91 ± 2.08                                       |
|                                 | TT                                 | 27  | 31.59 ± 10.84                     | 2.46 ± 1.23                                       |
|                                 | <i>p</i> <sup>GG vs. TT</sup>      |     | <i>t</i> = 1.34, <i>P</i> = 0.189 | <i>t</i> = 3.54, <i>P</i> = 0.001                 |
| <b>Control</b>                  |                                    |     |                                   |                                                   |
|                                 | GG                                 | 10  | 34.16 ± 7.55                      | 7.77 ± 5.33                                       |
|                                 | GT                                 | 23  | 33.30 ± 9.62                      | 5.61 ± 4.90                                       |
|                                 | TT                                 | 20  | 32.5±9.51                         | 4.23 ± 2.41                                       |
|                                 | <i>p</i> <sup>GG vs. TT</sup>      |     | <i>t</i> = 1.45 <i>P</i> = 0.885  | <i>t</i> = 3.34, <i>P</i> = 0.003                 |
| <b>Enzyme activity analysis</b> |                                    |     |                                   |                                                   |
| <b>Total</b>                    |                                    |     |                                   |                                                   |
|                                 | Schizophrenia                      | 74  | 29 ± 10.27                        | 4.30 ± 1.94                                       |
|                                 | Control                            | 73  | 28.65 ± 5.54                      | 6.31 ± 2.83                                       |
|                                 | <i>P</i>                           |     | <i>t</i> = 0.25, <i>P</i> = 0.802 | <i>t</i> = 5.02, <i>P</i> = 1.40×10 <sup>-6</sup> |
| <b>Schizophrenia</b>            |                                    |     |                                   |                                                   |
|                                 | GG                                 | 15  | 29.6 ± 10.45                      | 4.97 ± 1.39                                       |
|                                 | GT                                 | 32  | 30.84 ± 11.13                     | 4.51 ± 2.25                                       |
|                                 | TT                                 | 27  | 26.48 ± 8.87                      | 3.68 ± 1.67                                       |
|                                 | <i>p</i> <sup>GG vs. TT</sup>      |     | <i>t</i> = 1.02, <i>P</i> = 0.312 | <i>t</i> = 2.54, <i>P</i> = 0.015                 |
|                                 | <i>p</i> <sup>GG + GT vs. TT</sup> |     | <i>t</i> = 1.62, <i>P</i> = 0.111 | <i>t</i> = 2.13, <i>P</i> = 0.036                 |
| <b>Control</b>                  |                                    |     |                                   |                                                   |
|                                 | GG                                 | 7   | 30.57 ± 5.26                      | 8.01 ± 5.60                                       |
|                                 | GT                                 | 36  | 28.27 ± 5.60                      | 6.68 ± 5.61                                       |
|                                 | TT                                 | 30  | 28.66 ± 5.61                      | 5.48 ± 5.54                                       |
|                                 | <i>p</i> <sup>GG vs. TT</sup>      |     | <i>t</i> = 0.82, <i>P</i> = 0.419 | <i>t</i> = 2.59, <i>P</i> = 0.014                 |
|                                 | <i>p</i> <sup>GG + GT vs. TT</sup> |     | <i>t</i> = 0.01, <i>P</i> = 0.991 | <i>t</i> = 2.16, <i>P</i> = 0.034                 |

1 Abbreviations: No: number; \*: *P* < 0.05.

**Table S5. Demographic characteristics of sample for analysis of genotype and allele distributions**

| Variables                          |        | Patients            | Controls         | Statistical tests |
|------------------------------------|--------|---------------------|------------------|-------------------|
| Total Number                       |        | 1069                | 1023             |                   |
| Mean Age $\pm$ SD (year)           |        | 34.42 $\pm$ 13.15   | 34.16 $\pm$ 9.35 | t=0.51 P=0.61     |
| Gender N (%)                       | Male   | 684 (63.9%)         | 619(60.5%)       | $\chi^2=2.69$     |
|                                    | Female | 385(36.1%)          | 404(39.5%)       | P=0.10            |
| Age at onset (Mean $\pm$ SD, year) |        | 24.96 $\pm$ 9.51    |                  |                   |
| Duration (Mean $\pm$ SD, month)    |        | 125.82 $\pm$ 185.49 |                  |                   |
| Family history: n (%)              |        |                     |                  |                   |
| +                                  |        | 139                 |                  |                   |
| -                                  |        | 930                 |                  |                   |
| PANSS (Mean $\pm$ SD, year)        |        |                     |                  |                   |
| total score                        |        | 77.34 $\pm$ 19.24   |                  |                   |
| P subscore                         |        | 21.60 $\pm$ 7.49    |                  |                   |
| N subscore                         |        | 18.03 $\pm$ 8.78    |                  |                   |
| G subscore                         |        | 36.35 $\pm$ 9.64    |                  |                   |

Abbreviations: SD: standard deviation; N: number; PANSS: Positive and Negative Syndrome Scale; P: Positive scale; N: Negative scale; G: General Psychopathology scale.

**Table S6. Estimation of LD between each pair of loci in Glo-1**

| SNP       | rs1130534 |                | rs4746 |                | rs1781735 |                |
|-----------|-----------|----------------|--------|----------------|-----------|----------------|
|           | D'        | R <sup>2</sup> | D'     | R <sup>2</sup> | D'        | R <sup>2</sup> |
| rs9470916 | 0.972     | 0.924          | 1.0    | 0.059          | 0.967     | 0.188          |
| rs1130534 | —         | —              | 1.0    | 0.061          | 0.995     | 0.204          |
| rs4746    | —         | —              | —      | —              | 0.934     | 0.085          |

Abbreviations: LD: Linkage disequilibrium

**Table S7. Haplotype analysis of SNPs in the Glo-1 gene in schizophrenic patients and controls**

| rs9470916 –<br>rs1130534 –<br>rs4746-<br>rs1781735 | Frequency | Schizophrenia |       | Controls |       | $\chi^2$ | P      | OR (95 % CI)      |
|----------------------------------------------------|-----------|---------------|-------|----------|-------|----------|--------|-------------------|
|                                                    |           | N             | %     | N        | %     |          |        |                   |
| C-T-A-G                                            | 0.356     | 660.6         | 33.84 | 666.4    | 37.44 | 5.13     | 0.024* | 0.86(0.75 - 0.98) |
| A-A-A-T                                            | 0.255     | 510.9         | 26.17 | 438.9    | 24.66 | 1.13     | 0.288  | 1.08(0.94 - 1.26) |
| C-T-A-T                                            | 0.23      | 455.3         | 23.32 | 404.5    | 22.73 | 0.17     | 0.680  | 1.03(0.89 - 1.20) |
| C-T-C-T                                            | 0.14      | 285.1         | 14.61 | 235.9    | 13.25 | 1.40     | 0.237  | 1.12(0.93 - 1.35) |

Haplotype frequency <0.03 in both schizophrenic patients and controls has been dropped.

Abbreviations: N: number; OR: odds ratio; 95% CI 95% confidence interval.

**Table S8. The POWER calculation for analysis of allele and genotype distribution of Glo-1 polymorphisms**

| SNP       | Case | Control | MAF  | Power |
|-----------|------|---------|------|-------|
| rs1781735 | 1069 | 1023    | 0.41 | 1     |
| rs9470916 | 1069 | 1023    | 0.2  | 1     |
| rs1130534 | 1069 | 1023    | 0.31 | 1     |
| rs4746    | 1069 | 1023    | 0.11 | 0.993 |

Abbreviations: MAF: minor allele frequency. Power was calculated using the MAF of each allele and with an OR of 1.5 at the 0.05 level.

**Table S9. Demographic and clinical characteristics for schizophrenia patients and healthy controls in the imaging-genetics subgroup**

|                                               | TT<br>n=40        | G carriers<br>n=51 | Statistical tests | P    |
|-----------------------------------------------|-------------------|--------------------|-------------------|------|
| Age (Mean $\pm$ SD, years)                    | 26.77 $\pm$ 7.38  | 29.07 $\pm$ 8.36   | t = 1.21          | 0.23 |
| Sex, NO. Male/Female                          | 23/17             | 30/21              | $\chi^2=0.02$     | 1.00 |
| Years of education (Mean $\pm$ SD, years)     | 10.73 $\pm$ 2.61  | 10.56 $\pm$ 3.32   | t =0.24           | 0.81 |
| Age of onset (Mean $\pm$ SD, years)           | 25.76 $\pm$ 7.51  | 27.76 $\pm$ 9.05   | t=0.97            | 0.33 |
| Duration of psychosis (Mean $\pm$ SD, months) | 13.29 $\pm$ 22.06 | 6.56 $\pm$ 14.01   | t=1.56            | 0.12 |
| PANSS (Mean $\pm$ SD)                         |                   |                    |                   |      |
| Total scores of PANSS                         | 75.93 $\pm$ 22.23 | 76.83 $\pm$ 18.64  | t=0.18            | 0.86 |
| Positive scores of PANSS                      | 23.69 $\pm$ 9.52  | 24.22 $\pm$ 7.74   | t=0.26            | 0.80 |
| Negative scores of PANSS                      | 16.69 $\pm$ 12.88 | 17.78 $\pm$ 12.48  | t=0.36            | 0.72 |
| General psychopathological scores of PANSS    | 35.55 $\pm$ 10.52 | 34.83 $\pm$ 9.22   | t=0.30            | 0.76 |
| Family psychotic history, NO. PFH/NFH         | 3/36              | 7/44               | $\chi^2=0.81$     | 0.51 |

Abbreviations: NFH, negative family history; PFH, positive family history; PANSS, Positive and Negative Syndrome Scale.
